# Supplementary material for: Electrolyte additive strategy enhancing the electrochemical performance of a soft-packed LiCoO2//graphite full cell
Source: Royal Society of Chemistry journal article supplement (doi:10.1039/d2dt01088g), 2022-01-01
Supplement: d2dt01088g1.pdf [file d2dt01088g1.pdf]

## Electrolyte Additive Strategy Enhancing the Electrochemical Performance of Soft-Packed LiCoO<sub>2</sub>//Graphite Full Cell

Hongjie Su <sup>†</sup>, Zezhong Xie <sup>†</sup>, Jin Feng <sup>†</sup>, Qiushi Wang <sup>†\*</sup>, Junyi Zhou <sup>†</sup>, Qishan Fu <sup>‡</sup>, Tao  
Meng <sup>†</sup>, Binbin Huang <sup>†</sup>, Changgong Meng <sup>¶,§</sup>, Yexiang Tong <sup>†\*</sup>

<sup>†</sup>: MOE of the Key Laboratory of Bioinorganic and Synthetic Chemistry. The Key Lab of  
Low-Carbon Chemistry & Energy Conservation of Guangdong Province. School of Chemistry.  
Sun Yat-sen University. Guangzhou 510275, People's Republic of China.

<sup>‡</sup>: School of Materials Science and Engineering. Sun Yat-sen University. Guangzhou 510275,  
People's Republic of China.

<sup>¶</sup>: School of Chemistry. Dalian University of Technology, Dalian 116024, People's Republic  
of China.

<sup>§</sup>: School of Chemistry. Dalian University, Dalian 116024, People's Republic of China.

\*Corresponding author. E-mail: [wangqsh6@mail.sysu.edu.cn](mailto:wangqsh6@mail.sysu.edu.cn)

\*Corresponding author. E-mail: [chedhx@mail.sysu.edu.cn](mailto:chedhx@mail.sysu.edu.cn)

Figure S1

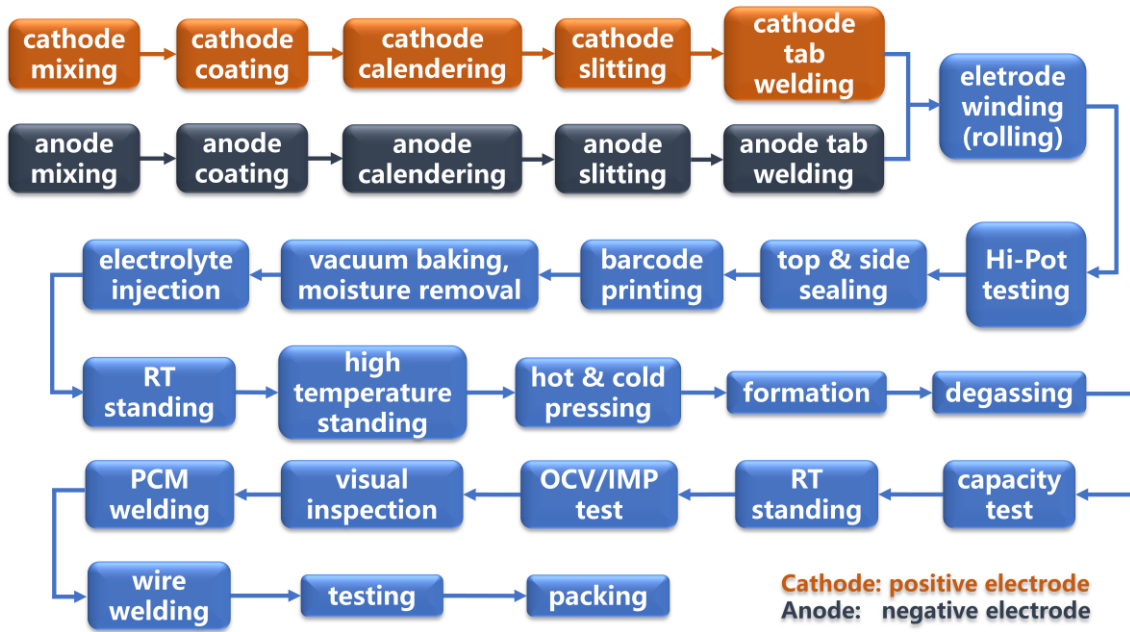

Figure S1. The flow chart of the assembling process of the soft-packed full cell.

Figure S2

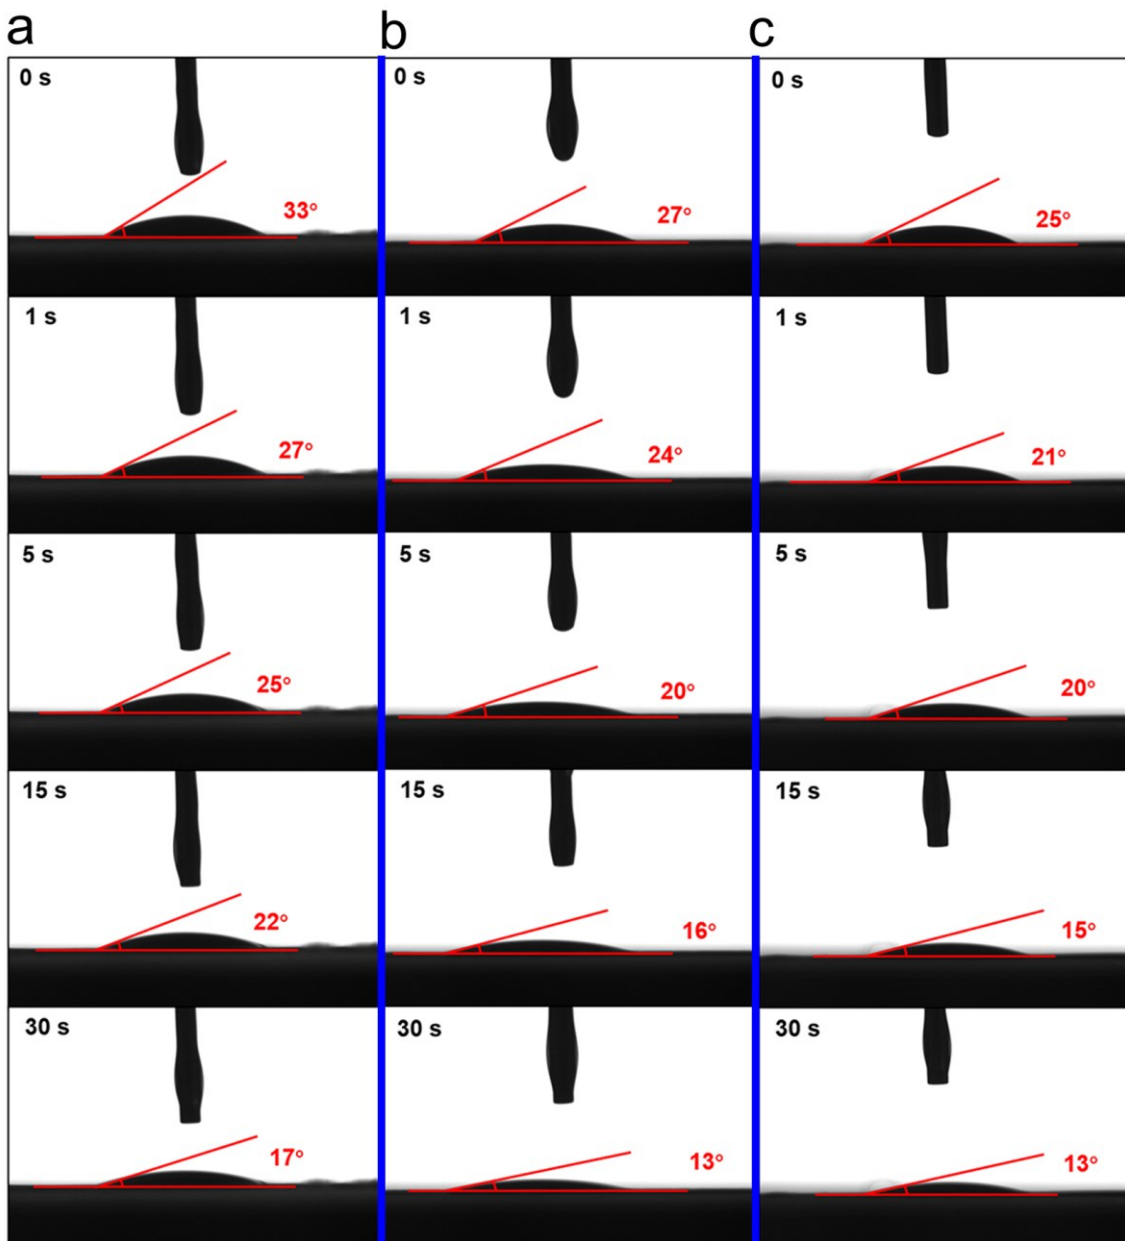

Figure S2. The contact angle test results of LiCoO<sub>2</sub> in F01 (1.0% FEC), F02 (1.5% FEC), F03 (2.0% FEC).

Figure S3

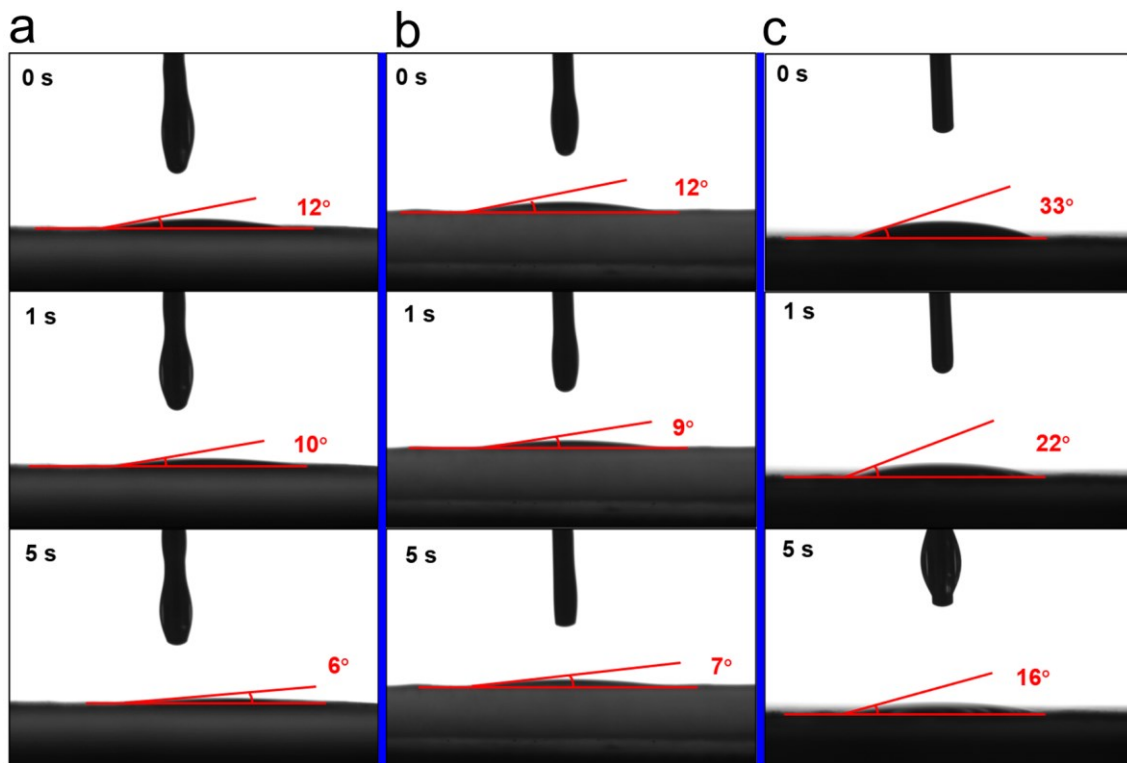

Figure S3. The contact angle test results of graphite in F01 (1.0% FEC), F02 (1.5% FEC), F03 (2.0% FEC).

**Figure S4**

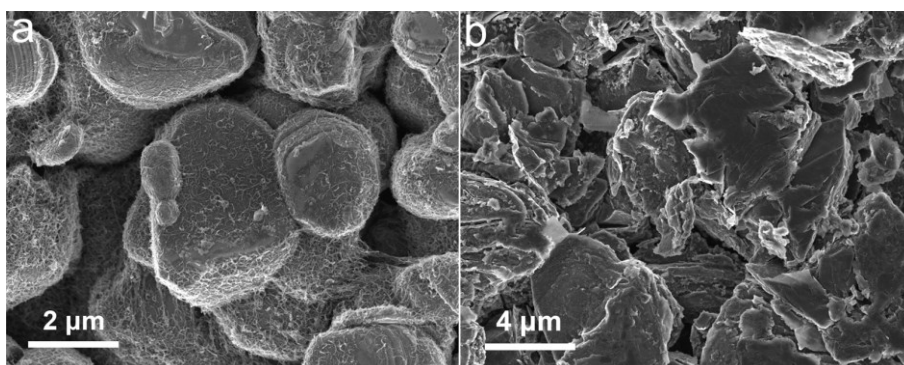

**Figure S4.** SEM results of (a)  $\text{LiCoO}_2$  and (b) graphite.

**Figure S5**

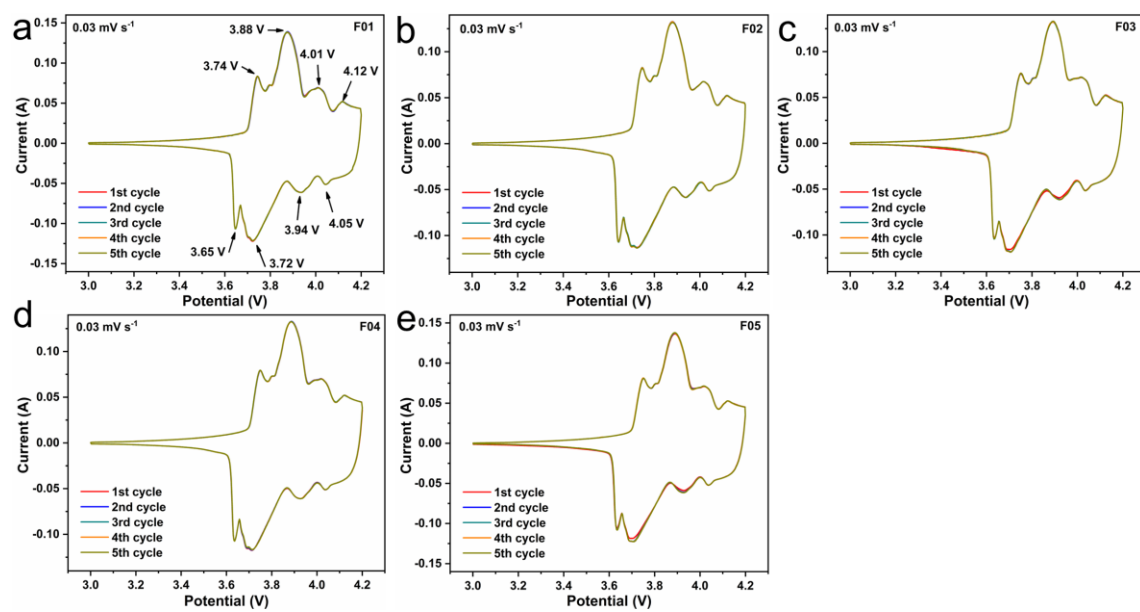

**Figure S5.** CV curves of all samples at  $0.03 \text{ mV s}^{-1}$ .

Figure S6

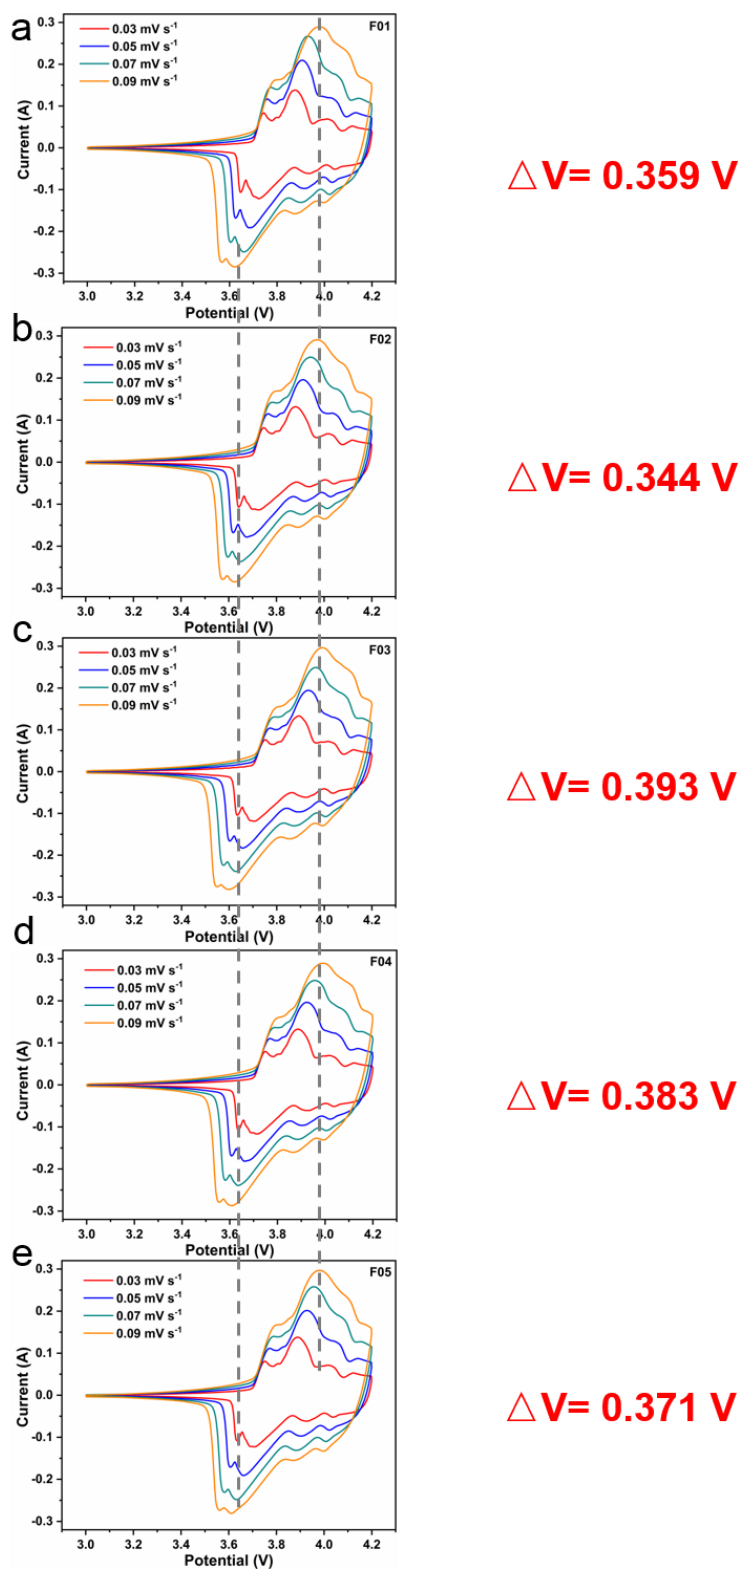

Figure S6. CV curves of all samples at the sweeping rates of 0.03-0.09 mV s<sup>-1</sup>.

**Figure S7**

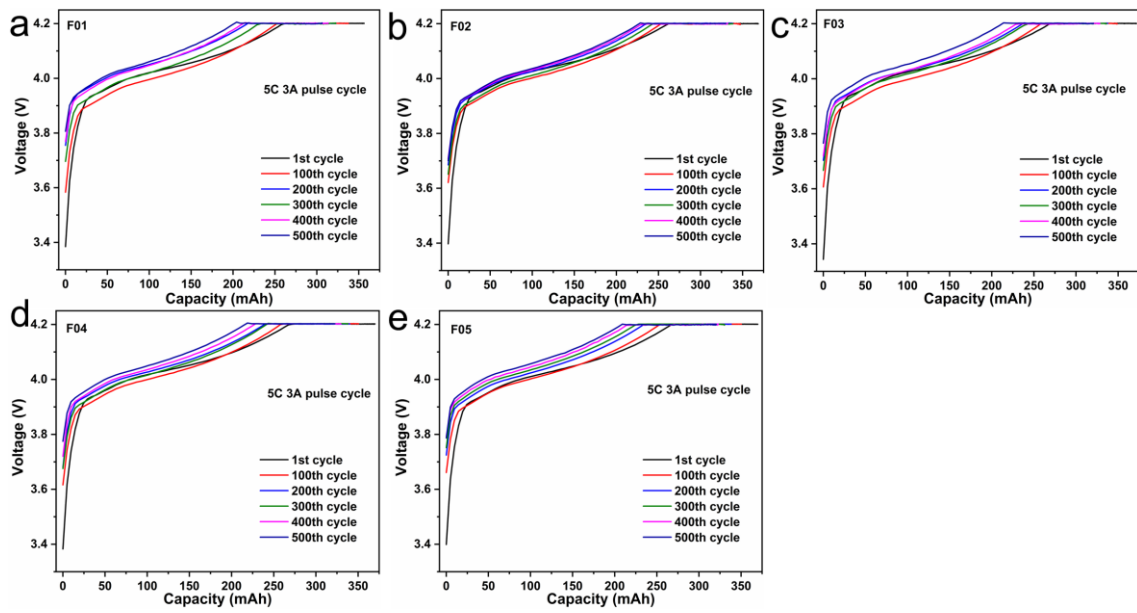

**Figure S7.** GCD curve of cycles (1st, 100, 200, 300, 400, 500 cycles) under 5C (charge) and 8.6C (3A) (discharge) pulse.



**Figure S8**

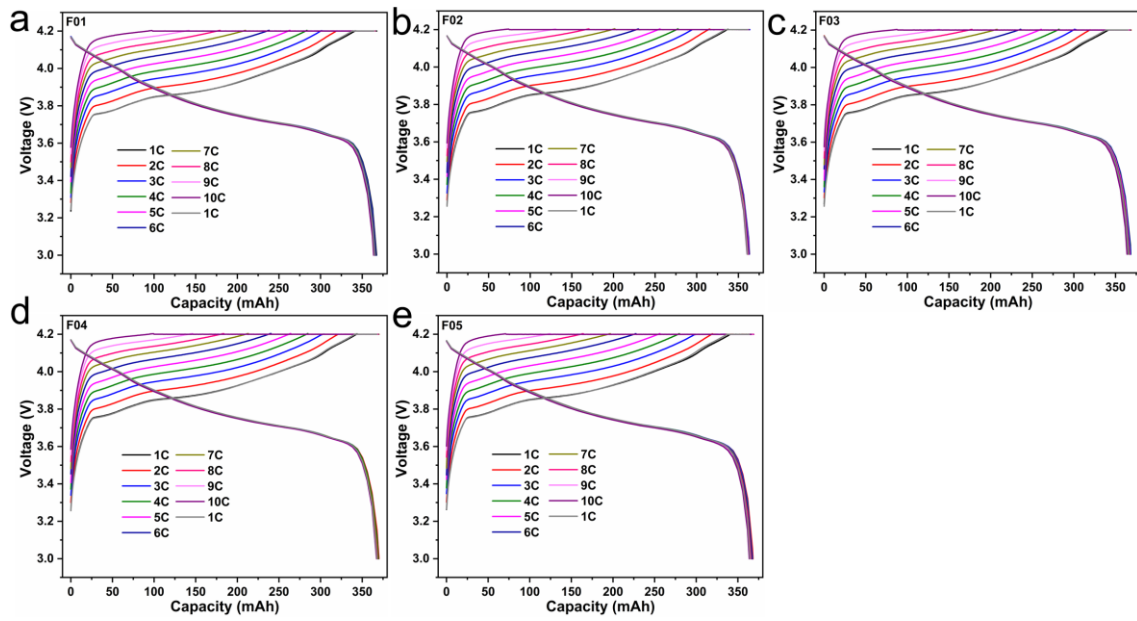

**Figure S8.** GCD curves of rate charging at 1C-10C and discharging at 1C of all the samples.

Table S1

Table S1. The comparison of the price of FEC and EC.

| FEC                      |        |                     |                 | EC             |                      |        |                          |
|--------------------------|--------|---------------------|-----------------|----------------|----------------------|--------|--------------------------|
| Supplier                 | Purity | URL                 | Price/kg        | Price/kg       | URL                  | Purity | Supplier                 |
| <b>Aladdin</b>           | >98%   | <a href="#">[1]</a> | <b>\$236.88</b> | <b>\$18.44</b> | <a href="#">[8]</a>  | >98%   | <b>Aladdin</b>           |
| <b>Macklin</b>           | 99%    | <a href="#">[2]</a> | <b>\$340</b>    | <b>\$21.56</b> | <a href="#">[9]</a>  | >99%   | <b>Macklin</b>           |
| <b>Reagent</b>           | 99%    | <a href="#">[3]</a> | <b>\$368.75</b> | <b>\$30.94</b> | <a href="#">[10]</a> | >99%   | <b>Reagent</b>           |
| <b>Alfa Aesar</b>        | 98%    | <a href="#">[4]</a> | <b>\$4670</b>   | <b>\$73.8</b>  | <a href="#">[11]</a> | 99%    | <b>Alfa Aesar</b>        |
| <b>Sigma aldrich</b>     | ≥99%   | <a href="#">[5]</a> | <b>\$13240</b>  | <b>\$1720</b>  | <a href="#">[12]</a> | ≥99%   | <b>Sigma aldrich</b>     |
| <b>Thermo Scientific</b> | 98%    | <a href="#">[6]</a> | <b>\$6871.4</b> | <b>\$75.8</b>  | <a href="#">[13]</a> | 99%    | <b>Thermo Scientific</b> |
| <b>P212121</b>           | >98%   | <a href="#">[7]</a> | <b>\$862</b>    | <b>\$82</b>    | <a href="#">[14]</a> | >99%   | <b>P212121</b>           |

1 USD = 6.4 CNY, Data collected at 2021/11/05 (GMT+8).

#### Web URL:

- [1] [https://www.aladdin-e.com/zh\\_cn/f120339.html](https://www.aladdin-e.com/zh_cn/f120339.html)
- [2] <http://www.macklin.cn/products/F810047>
- [3] <https://www.reagent.com.cn/goodsDetail/42a40d6644c0451e99a012290a9ce439>
- [4] <https://www.alfa.com/zh-cn/catalog/H61502/>
- [5] <https://www.sigmaldrich.com/US/en/product/aldrich/901686?context=product>
- [6] <https://www.fishersci.ca/shop/products/4-fluoro-1-3-dioxolan-2-one-98-2/p-7053812>
- [7] <https://store.p212121.com/fluoroethylene-carbonate/>
- [8] [https://www.aladdin-e.com/zh\\_cn/e105727.html](https://www.aladdin-e.com/zh_cn/e105727.html)
- [9] <http://www.macklin.cn/products/E808838>
- [10] <https://www.reagent.com.cn/goodsDetail/ce0e69c7788847c8ad1331f93a2e45fd>
- [11] <https://www.alfa.com/zh-cn/catalog/A15735/>

[12]

[https://www.sigmaaldrich.com/US/en/search/96-49-1?focus=products&page=1&perPage=30  
&sort=relevance&term=96-49-1&type=product](https://www.sigmaaldrich.com/US/en/search/96-49-1?focus=products&page=1&perPage=30&sort=relevance&term=96-49-1&type=product)

[13]

[https://www.fishersci.ca/shop/products/ethylene-carbonate-99-thermo-scientific/p-3736441#?  
keyword=96-49-1](https://www.fishersci.ca/shop/products/ethylene-carbonate-99-thermo-scientific/p-3736441#?keyword=96-49-1)

[14] <https://store.p212121.com/ethylene-carbonate/>

Table S2

Table S2. The main constituent of electrolyte.

| Ingredients                                                    | Structural formula |
|----------------------------------------------------------------|--------------------|
| Ethylene carbonate (EC)                                        |                    |
| Fluoroethylene carbonate (FEC)                                 |                    |
| Propylene carbonate (PC)                                       |                    |
| Ethyl methyl carbonate (EMC)                                   |                    |
| Propyl propionate (PP)                                         |                    |
| Lithium hexafluorophosphate (Li <sub>x</sub> PF <sub>6</sub> ) |                    |
| Vinylene carbonate (VC)                                        |                    |
| 1,3-Propanesultone (PS)                                        |                    |
